# Supplementary material
Source: Springer Nature journal article supplement (https://www.springermedizin.de/resource/supplementary/12889_2005_375_MOESM1_ESM.pdf/9501406)

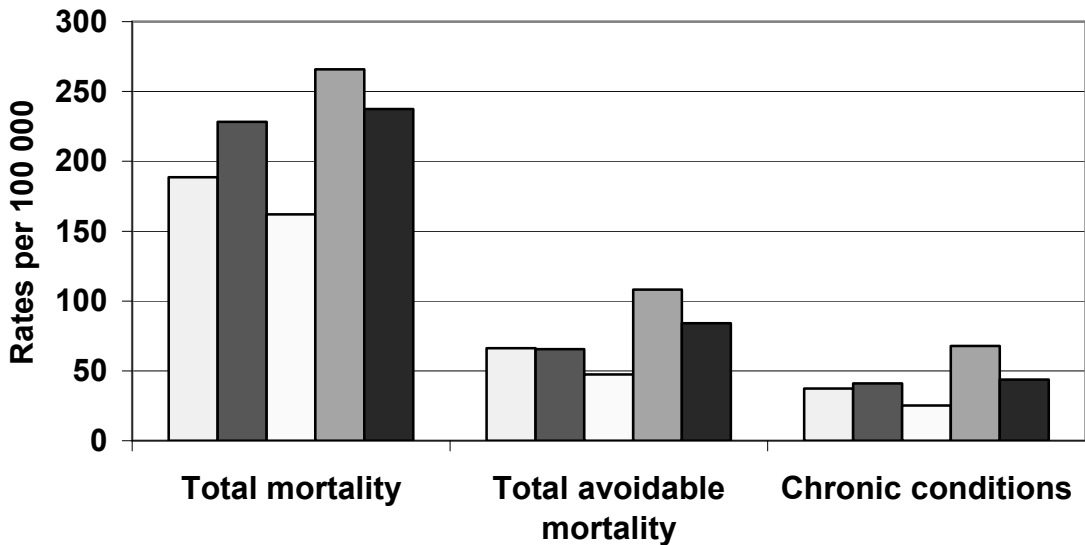

Dutch
  Turkish
  Moroccan
  Surinam
  Antillean/Aruban

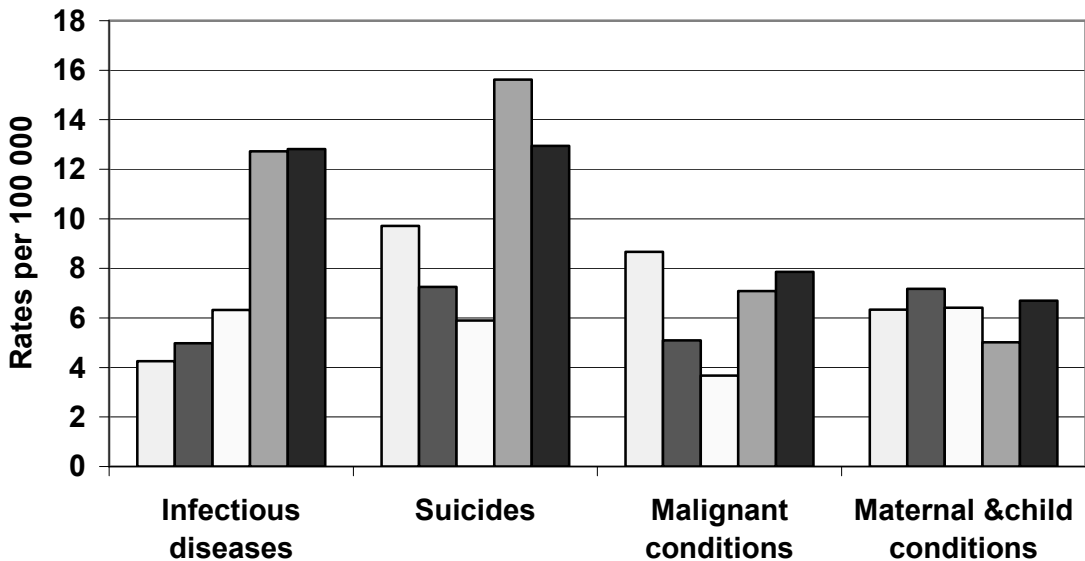

Supplement: MOESM1 [file 9501406]
